# Supplementary material for: The All Our Babies pregnancy cohort: design, methods, and participant characteristics
Source: BMC Pregnancy Childbirth. 2013 Jan 31;13(Suppl 1):S2. doi: 10.1186/1471-2393-13-S1-S2 (PMC3561154; doi:10.1186/1471-2393-13-S1-S2)
Supplement: Additional file 1 — Variables assessed by questionnaire in the AOB study by data collection time point [file 1471-2393-13-S1-S2-S1.xlsx]

## Sheet: Sheet1
Variables assessed by questionnaire in the AOB study by data collection time point
Category	<25 weeks	34-36 weeks	4 months postpartum
Maternal prenatal health
Difficulty/ease obtaining prenatal care	x	x	x
Prenatal care provider(s)	x	x	x
Height	x
Weight	x	x	x
Gestational age	x	x
Breastfeeding intention		x
Level of happiness with pregnancy	x	x
Pregnancy timing	x
Prescription medications and/or herbal preparations		x
Ultrasounds/estimated due date		x
Prenatal classes		x
Pregnancy history
Parity and Gravidity	x
History of preterm birth, low birth weight birth	x
Pre-pregnancy
Pregnancy planning – information type and provider	x
Birth control use	x
Conception interventions/supports	x
Service utilization
Self - health care provider(s), # visits	x	x	x
Baby - health care provider(s), # visits			x
Community resources			x
Vaccinations			x
Food/Exercise/Housing
Exercise frequency and duration	x	x
Eating habits (quality & quantity)	x	x
Weight gain perception	x	x
Food security	x	x	x
Housing stability (rent/own, # of moves)	x		x
Social support
Perceived social support [38]	x	x	x
Satisfaction with social supports	x	x	x
Presence of partner	x	x	x
Satisfaction with partner's support	x	x	x
Emotional/Physical Health
Emotional and Physical Health [39]	x	x	x
Symptoms of Depression[40], Anxiety[41] , Stress[42]	x	x	x
Optimism[43]		x
Parenting Morale[44]			x
Postpartum weight			x
History and Life Events
History of alcohol or drug problems	x
History of depression/mental illness	x
History of physical/emotional/financial/sexual abuse/neglect		x
Postpartum physical/emotional/financial/sexual abuse/neglect			x
Neighbourhood safety		x
Lifestyle (smoking, drugs, alcohol)
Alcohol consumption [45]	x
Smoking, alcohol, drug use before pregnancy recognition		x	x
Smoking, alcohol, drug use after pregnancy recognition		x
Postpartum smoking, alcohol, drug use			x
Demographics
Marital status, education, birthplace, length of time in Canada, income	x
Ethnicity, parental history, language	x
Work Status
Main activity		x	x
Work schedule, hours/wk		x	x
Child care arrangements for work			x
Return to work/school intentions			x
Financial support/maternity leave		x	x
Labour and Delivery
Number of babies born / baby's weight			x
Type / location of delivery			x
Pain medications			x
Support through labour			x
Length of hospital stay - baby and mom			x
Breastfeeding and Feeding
Breastfeeding yes/no / when breastfeeding initiated			x
Reasons for not breastfeeding			x
Breastfeeding support – formal and informal			x
Breastfeeding difficulty			x
Breastfeeding exclusivity			x
Why breastfeeding stopped (if applicable)			x
Breastfeeding experience satisfaction			x
Feeding Problems [46]			x
You and Your Baby
Baby's sleep patterns			x
Parent–Infant Interaction [47, 48]			x
Parenting [49]			x
